# Supplementary material for: A Complex Evolutionary History in a Remote Archipelago: Phylogeography and Morphometrics of the Hawaiian Endemic Ligia Isopods
Source: PubMed Central journal article supplement (PMC3875554; doi:10.1371/journal.pone.0085199), 2013-12-30

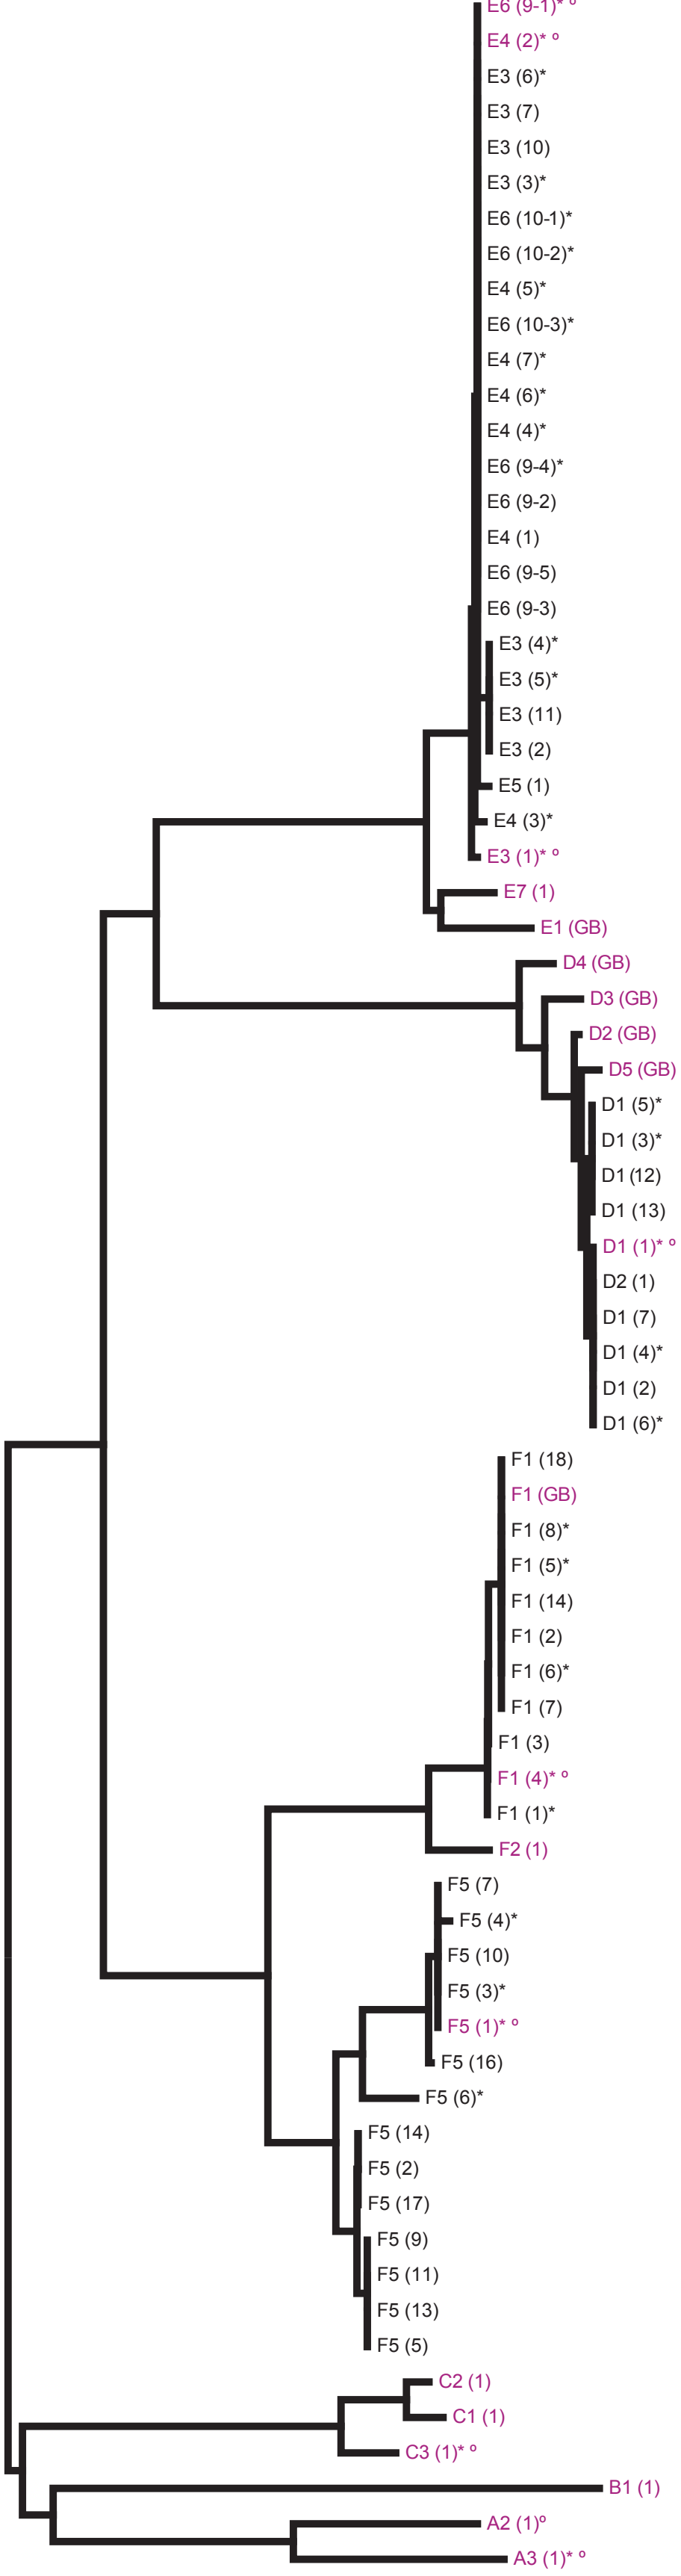

Supplement: pone.0085199.s005.pdf [file pone.0085199.s005.pdf]
